# Supplementary material for: Electrically Conductive Membranes Obtained by Simultaneous Electrospinning and Electrospraying Processes
Source: Hindawi journal article supplement (doi:10.1155/2016/8362535), 2016-01-01

SUPPORTING INFORMATIONS

Figure S 1 Images of the obtained samples at different electrospraying conditions, with 22G Needle

| Needle<br>22G | 2,0 ml/h                                                                           | 1,0 ml/h                                                                           | 0,5 ml/h                                                                           |
|---------------|------------------------------------------------------------------------------------|------------------------------------------------------------------------------------|------------------------------------------------------------------------------------|
| 18 kV         | 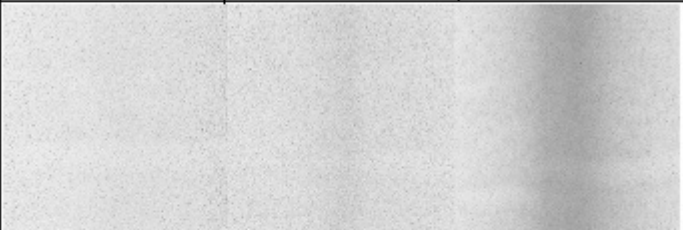  |                                                                                    |                                                                                    |
| 15 kV         | 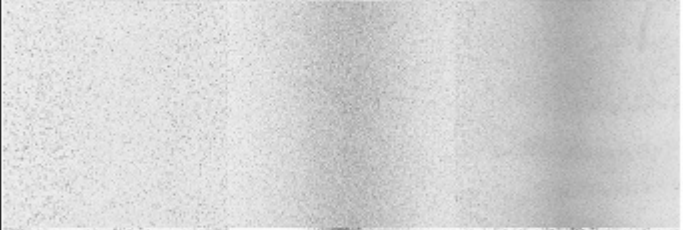  |                                                                                    |                                                                                    |
| 10 kV         | 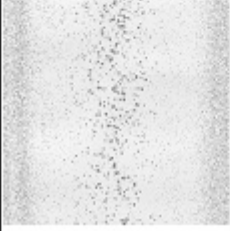 | 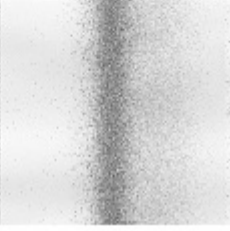 | 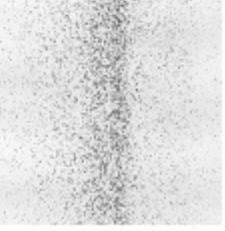 |

Figure S 2 Images of the obtained samples at different electrospraying conditions, with 20G Needle

| Needle<br>20G | 2,0 ml/h                                                                           | 1,0 ml/h | 0,5 ml/h |
|---------------|------------------------------------------------------------------------------------|----------|----------|
| 18 kV         | 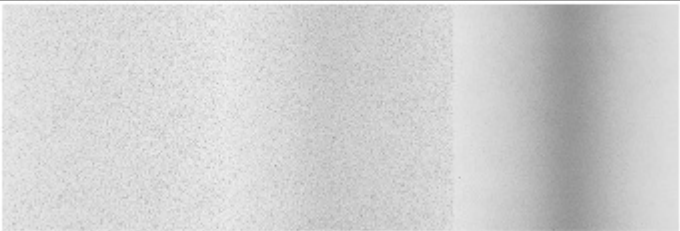  |          |          |
| 15 kV         | 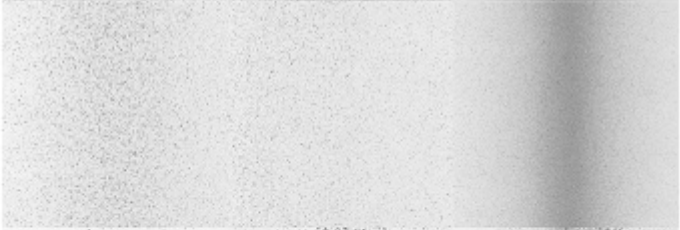  |          |          |
| 10 kV         | 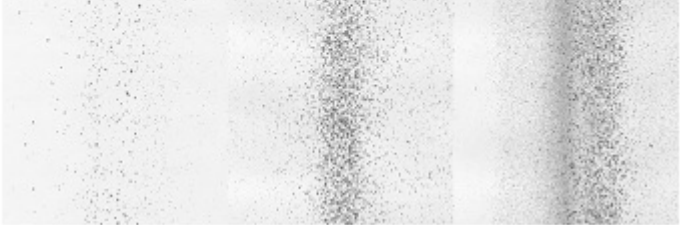 |          |          |

Figure S 3 Absorption spectra of TPU solution and Sodium dodecyl sulfate solutions

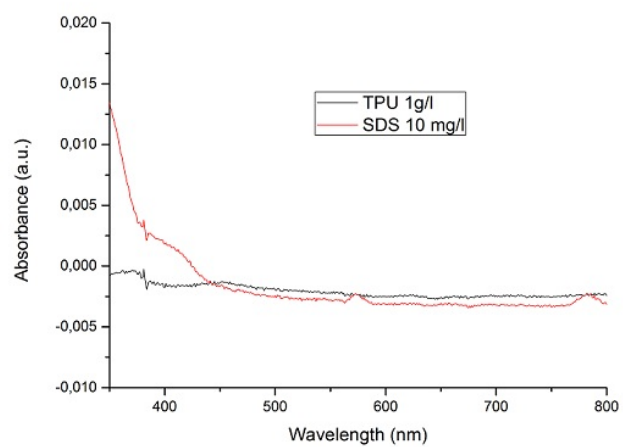

Figure S 4. Non-homogeneous distribution of MWCNTs on the membrane obtained by incident approach

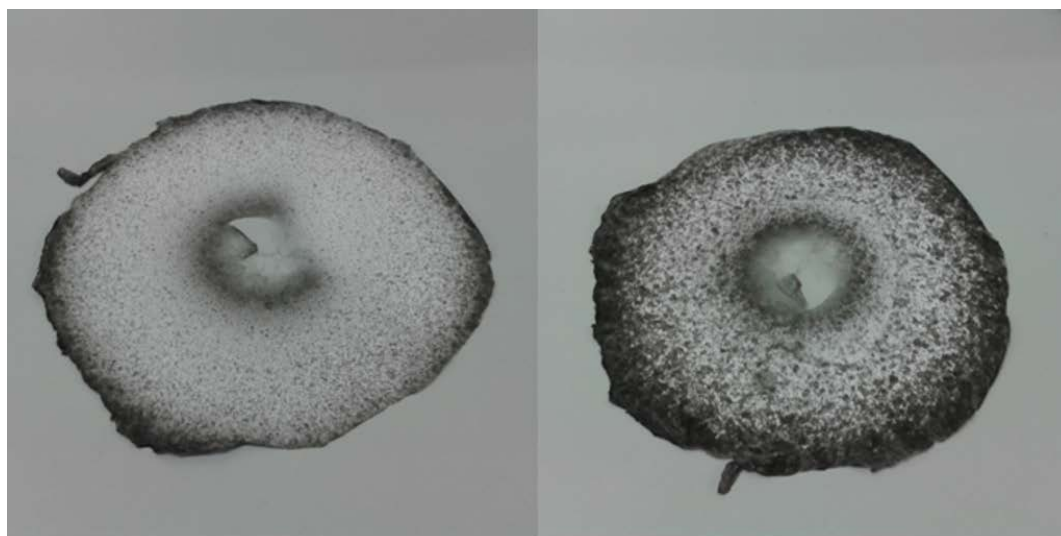

Supplement: f1 [file 8362535.f1.pdf]
